# Supplementary material
Source: publisher site journal article supplement (https://www.spandidos-publications.com/662/downloadSupplementary)
Supplement: Supplementary file 1 [file downloadSupplementary]

Figure S1. (A) Amplification of angio-miRNAs. U6 was used as an internal control. (B) Amplification of target mRNAs of angio-miRNAs. GAPDH was used as an internal control. (C and D) Melting curves of angio-miRNAs. (E) Melting curves of target mRNAs of angio-miRNAs. Angio-miRNA, angiogenesis-regulatory microRNA. HGS, hepatocyte growth factor-regulated tyrosine kinase substrate; VEGFR2, vascular endothelial growth factor receptor 2; HUVEC, human umbilical vein endothelial cell; CM, conditioned medium; RASA1, RAS P21 protein activator 1.  $\Delta Rn$  indicates the fluorescence intensity minus reference dye (passive reporter) and  $-R$  indicates the derivatives of melt curves (fluorescence intensity).

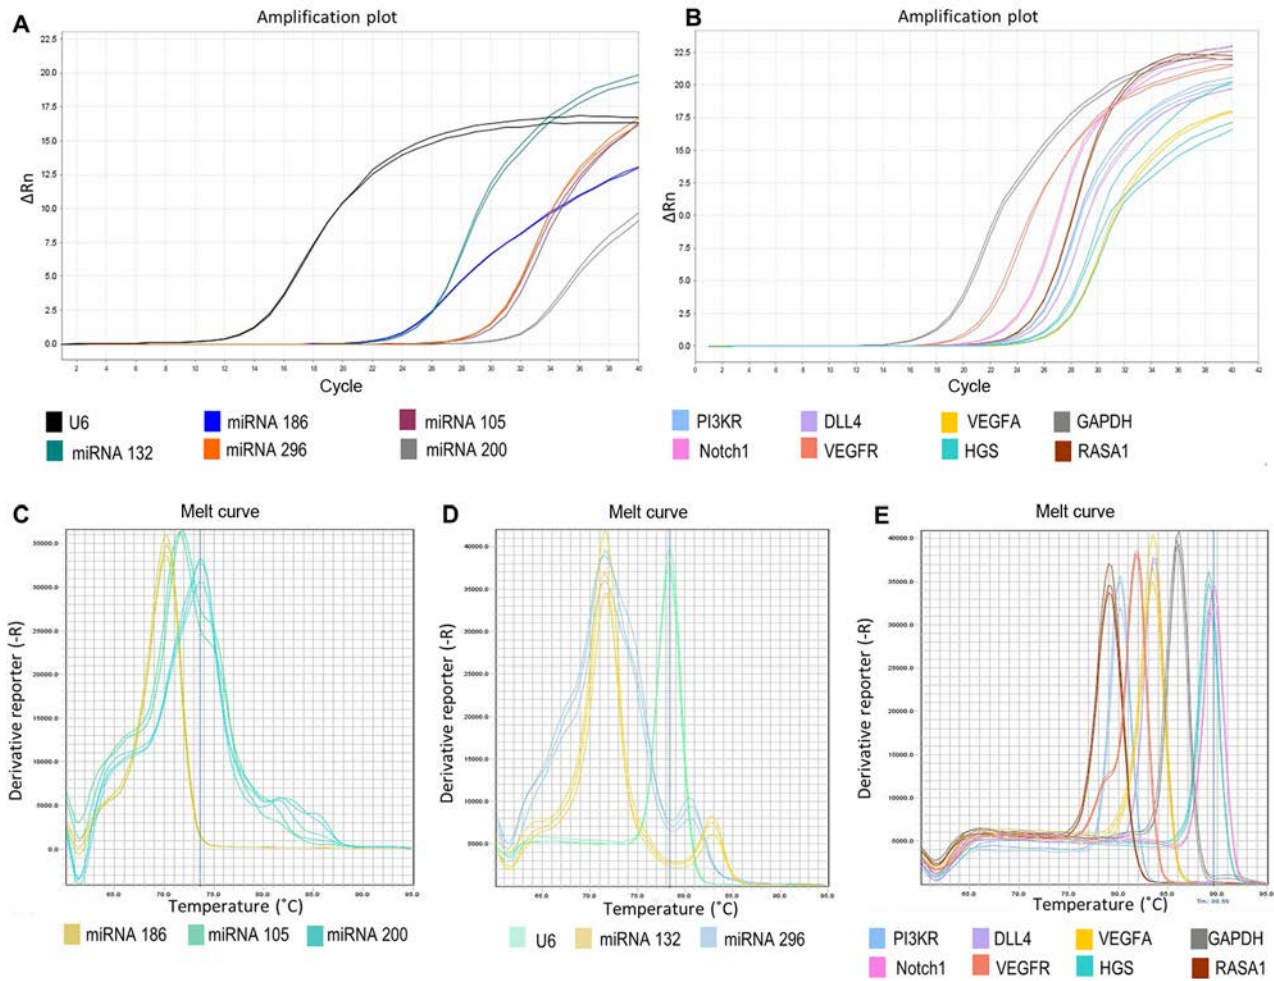

Figure S2. (A) Fold-changes in angio-miRNA expression relative to EBM for SW620-CM, LoVo-CM and 10 ng/ml VEGF-treated HUVECs at 6 h. (B) Experimental design for assessing miRNA fold-change variance of each step in RT-qPCR. Four replicates were included in each step. (C) RSD in fold-changes of indicated miRNA. Average values were derived from the four miRNA. Angio-miRNA, angiogenesis-regulatory microRNA; miRNA, miR, microRNA; CM, conditioned medium; EBM, endothelial cell basal medium; HUVEC, human umbilical vein endothelial cell; VEGF, vascular endothelial growth factor; RT-qPCR, reverse transcription-quantitative PCR; RSD, relative standard deviation.

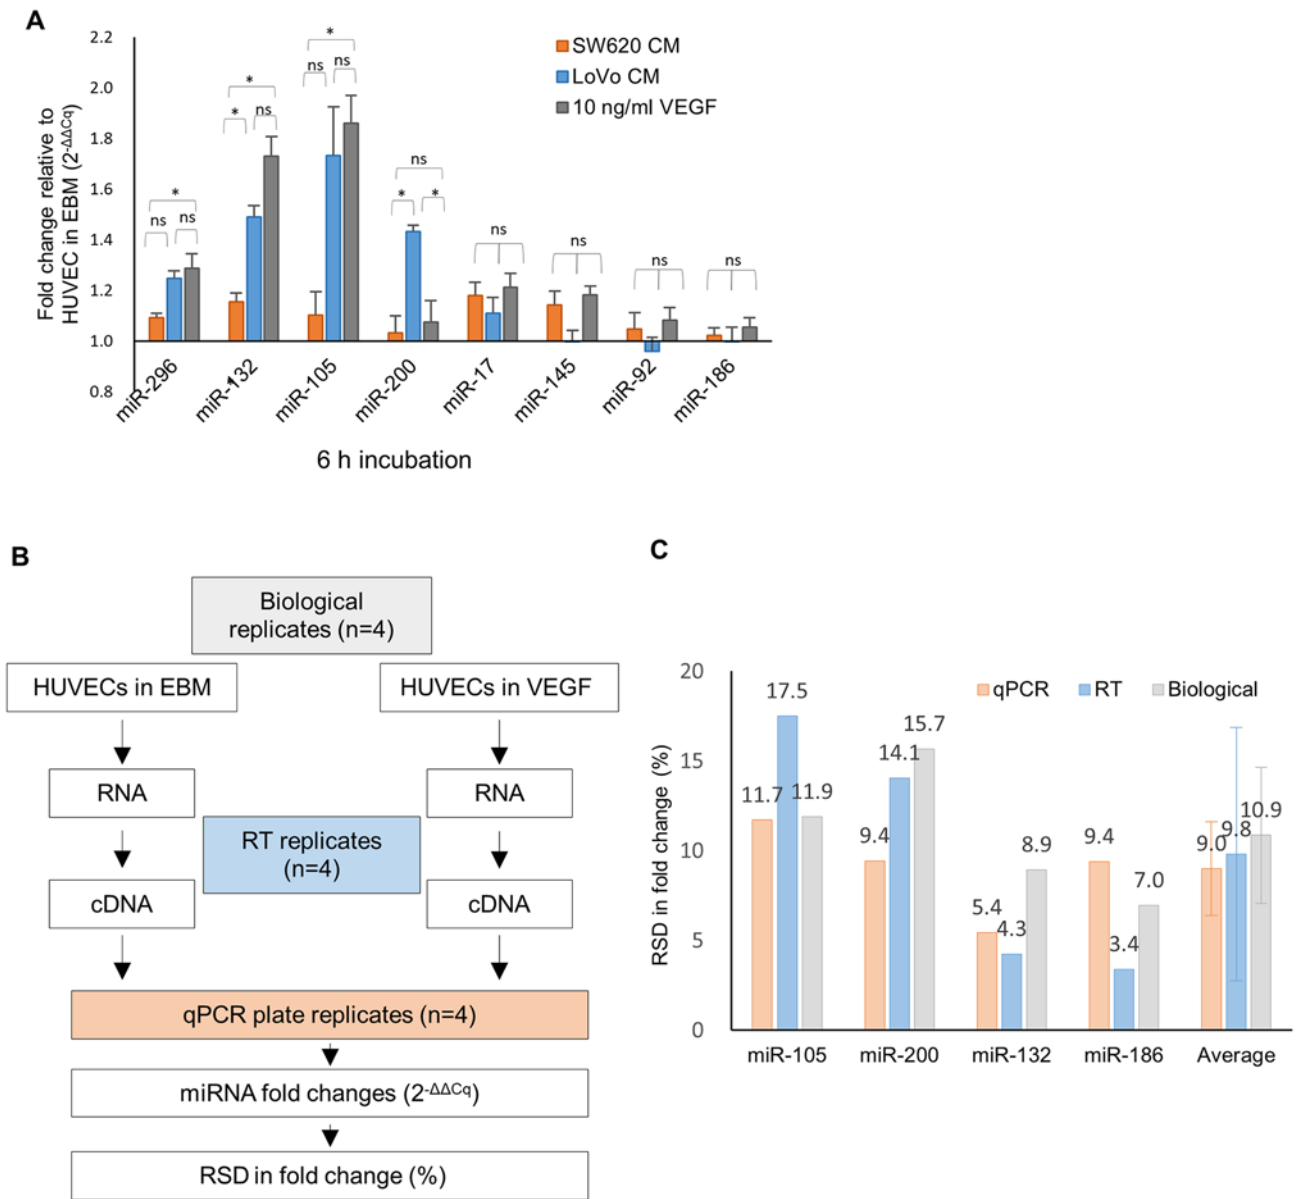

Table SI. Angio-miRNA primers in reverse transcription-quantitative PCR.

---

| Primer name | miRNA primer sequence (5' to 3') |
|-------------|----------------------------------|
| U6_F        | CTCGCTTCGGCAGCACA                |
| U6_R        | AACGCTTCACGAATTTGCGT             |
| miR296_F    | CCCTCAATCCTGTTGTGCCT             |
| miR132_F    | GGTAACAGTCTACAGCCATG             |
| miR105_F    | TGTTTGCCTCCTTCTTCGTC             |
| miR200_F    | TGAGCATCTTACCGGACAGT             |
| miR17_F     | GAATAATGTCAAAGTGCTTACAGTG        |
| miR145_F    | GTCCAGTTTTCCAGGAATCCCT           |
| miR92_F     | TATTGCACTTGTCCCGGCC              |
| miR186_F    | TTCCAAAGAATTCTCCTTTTGGG          |
| miR185_F    | GGGATTGGAGAGAAAGGCAG             |

---

Table SII. Target mRNA primers in reverse transcription-quantitative PCR.

| Primer name | mRNA primer sequence (5' to 3') |
|-------------|---------------------------------|
| HGS_F       | CCACAATGGCGAGTCTGA              |
| HGS_R       | GAGGGCTGGTAGAGCACA              |
| VEGFR2_F    | GGGATTGACTTCAACTGG              |
| VEGFR2_R    | ATGGGATTGGTAAGGATG              |
| PIK3R1_F    | TGGACGGCGAAGTAAAGCATT           |
| PIK3R1_R    | AGTGTGACATTGAGGGAGTCG           |
| RASA1_F     | GGACGAAGGTGACTCTCTGGAT          |
| RASA1_R     | GGAGGAGCGGTCAACGGTAT            |
| GAPDH_F     | ACCACAGTCCATGCCATCAC            |
| GAPDH_R     | TCCACCACCCTGTTGCTGTA            |
